RESEARCH ARTICLE

# Comparative Analysis of the Chrysanthemum Leaf Transcript Profiling in Response to Salt Stress

Yin-Huan Wu, Tong Wang, Ke Wang, Qian-Yu Liang, Zhen-Yu Bai, Qing-Lin Liu\*, Yuan-Zhi Pan, Bei-Bei Jiang, Lei Zhang

Department of Landscape Architecture, Sichuan Agricultural University, Chengdu, Sichuan, China

\* [qinglinliu@126.com](mailto:qinglinliu@126.com)

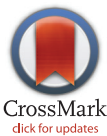

**OPEN ACCESS**

**Citation:** Wu Y-H, Wang T, Wang K, Liang Q-Y, Bai Z-Y, Liu Q-L, et al. (2016) Comparative Analysis of the Chrysanthemum Leaf Transcript Profiling in Response to Salt Stress. PLoS ONE 11(7): e0159721. doi:10.1371/journal.pone.0159721

**Editor:** Jin-Song Zhang, Institute of Genetics and Developmental Biology, Chinese Academy of Sciences, CHINA

**Received:** February 11, 2016

**Accepted:** July 7, 2016

**Published:** July 22, 2016

**Copyright:** © 2016 Wu et al. This is an open access article distributed under the terms of the [Creative Commons Attribution License](https://creativecommons.org/licenses/by/4.0/), which permits unrestricted use, distribution, and reproduction in any medium, provided the original author and source are credited.

**Data Availability Statement:** All relevant data are within the paper and its Supporting Information files.

**Funding:** The authors received no specific funding for this work.

**Competing Interests:** The authors have declared that no competing interests exist.

## Abstract

Salt stress has some remarkable influence on chrysanthemum growth and productivity. To understand the molecular mechanisms associated with salt stress and identify genes of potential importance in cultivated chrysanthemum, we carried out transcriptome sequencing of chrysanthemum. Two cDNA libraries were generated from the control and salt-treated samples (Sample\_0510\_control and Sample\_0510\_treat) of leaves. By using the Illumina Solexa RNA sequencing technology, 94 million high quality sequencing reads and 161,522 unigenes were generated and then we annotated unigenes through comparing these sequences to diverse protein databases. A total of 126,646 differentially expressed transcripts (DETs) were identified in leaf. Plant hormones, amino acid metabolism, photosynthesis and secondary metabolism were all changed under salt stress after the complete list of GO term and KEGG enrichment analysis. The hormone biosynthesis changing and oxidative hurt decreasing appeared to be significantly related to salt tolerance of chrysanthemum. Important protein kinases and major transcription factor families involved in abiotic stress were differentially expressed, such as MAPKs, CDPKs, MYB, WRKY, AP2 and HD-zip. In general, these results can help us to confirm the molecular regulation mechanism and also provide us a comprehensive resource of chrysanthemum under salt stress.

## Introduction

Salinity is one of the most remarkable abiotic factors which limiting the productivity and growth of crop plants [1]. Salinity may cause a series of morphological, physiological and biochemical changes [2], such as decreasing the number of flower buds, reducing water absorption ability of root, enhancing programmed cell death in some tissue types [1, 3]. Currently, increasing high salinity stress tolerance in plants is necessary. The genetic engineering strategies target at various metabolic pathways, accumulation of osmolytes, antioxidant enzymes and up-regulation of functional genes [4]. Among the complex molecular mechanisms, the up-regulation of functional genes expression occupies the important position in plant salt resistance [5, 6]. Various genes that function as stress sensors in signaling transduction pathways comprise a

network of protein-protein reactions and transcription factors [7, 8]. Receptor-like kinase (RLK) [9], mitogen-activated protein kinase (MAPK) [10, 11], calcium-dependent and calmodulin-independent protein kinase (CDPK) [12] and sucrose non-fermenting-1-related protein kinase (SnRK) [13] have participated in abiotic or biotic stress signal pathways. What's more, according to DNA binding domain characteristics, transcription factors linked to stress response can be divided into several families, such as bHLH, AP2/EREBP, bZIP, NAC, WRKY, MYB and MYC [14, 15].

Chrysanthemum is a well-known ornamental plant in the world. It has large genomes and lacks the genomic information on the basis of salt tolerance [5]. Nowadays, the development of next-generation sequencing (NGS) technology has become a main approach for gene function annotation, gene expression analysis and identified numerous genes in fundamental molecular aspects related to stress response [16–18]. In particular, this method is not dependent on the existing genomic sequence [19]. Obviously, NGS has facilitated the molecular biology research in both model and non-model plant. The previous transcriptome sequencing analysis of plants under salt stress focused on *Arabidopsis thaliana* [20–22], rice [23, 24] and other model plants. Although transcriptional changes in model plants have been identified, there is very limited information about the molecular elements that are specific to non-model plants under salt stress. In recent years, transcriptome analysis of non-model species, such as *Eleusine coracana* [25], *Chrysanthemum nankingense* [26], *Populus euphratica* [27], has made progress in knowing about the molecular mechanisms under salt stress.

Due to the high frequency irrigation and high evapotranspiration, salinity conditions in the cultivation greenhouse seriously affected the quality and quantity of cut chrysanthemum [28]. We considered measure transcriptome composition of chrysanthemum and identified regulatory genes according to gene expression levels under salt stress. Besides, RNA-Seq technology has also provided an opportunity to understand the gene regulation networks. Ultimately, we obtained DETs between control and salt treated samples and identified salt-sensitive genes. Data obtained will not only be useful in identifying potential candidate genes influenced by salt stress, but also promoting genetic engineering of chrysanthemum to improve salt tolerance,

## Methods

### Plant materials and treatments

Chrysanthemum (*Chrysanthemum morifolium* (Ramat.) Tzvel.) 'jinba', a popular cut chrysanthemum cultivar which was used in this experiment. The seedlings were grown on MS medium with a thermoperiod of 25°C (day) and 22°C (night) and a photoperiod of 16 h. After 24 days, the seedlings subjected to salt treatment and concentration gradient of NaCl solution was used to slow down the salt injury: 100mM for the first day, 200mM for the second day and 400mM for three days. The control seedlings were watered daily. Finally, the leaves were sampled for subsequent RNA-Seq after 5 days treatment (leaf samples were frozen with liquid nitrogen and stored at -80°C). Three biological replicates were used in each treatment.

### RNA extraction, RNA-seq library construction and sequencing

Total RNA was extracted following the manufacturer's instructions. The quality and quantity of total RNA were assessed at an absorbance ratio ( $OD_{260/280}$  and  $OD_{260/230}$ ) and 1% agarose gel electrophoresis. Replicates were mixed to supply 2 pooled samples for the sequencing analysis. Strand-specific RNA-seq libraries were constructed according to Zhong etc. [29] and sequenced on Illumina HiSeq2000 system, Shanghai Sangon Biotech, Shanghai, China. The raw sequencing data have been submitted to the NCBI Sequence Read Archive (SRA) database with accession number SRP074167.

## Sequence analysis, *de novo* assembly and annotation

The raw reads were cleaned by removing adapter sequences, low quality sequences (reads with ambiguous bases 'N'), and reads with Q-value < 20 bases [25]. Then we discard the reads with length less than 35 bp. Next, *de novo* assembly was performed by using Trinity (release 20121005, <http://trinityrnaseq.sourceforge.net/>) software to generate unigenes [30]. In addition, the redundant duplicated reads were removed.

The resulting unigenes were blasted against NCBI Nr (NCBI non-redundant protein database), Swiss-Prot, TrEMBL, CDD (Conserved Domain Database), Pfam and KOG (euKaryotic Orthologous Groups) databases (E-value ≤ 1e-5) [31]. Functional annotation by GO (Gene Ontology database) was analyzed using the Blast2GO program [32]. The KEGG (Kyoto Encyclopedia of Genes and Genomes) was also used to predict and classify possible functions.

## Identification of differentially expressed genes

The RPKM reads (clean reads per kilobase per million) method ([http://www.cbcbio.com/manual/genomics/Definition\\_RPKM.html](http://www.cbcbio.com/manual/genomics/Definition_RPKM.html)) was used to estimate transcript abundance on the base of eliminating the influence of different gene length and sequencing discrepancy [33, 34]. Furthermore, we used the method of an algorithm developed previous to compare the differences in gene expression [34, 35]. The false discovery rate (FDR) was applied to correct for P value in multiple hypothesis testing. And in this analysis, FDR ≤ 0.01 and an absolute value of log<sub>2</sub> ratio ≥ 1 (two-fold change) were set as the threshold to judge the significance of gene expression differences [36]. The identified DETs were then carried out into GO functional analysis and KEGG pathway analysis.

## Quantitative Real-time PCR (qRT-PCR) validation of differential expression

In order to verify the data, eight salt responsive transcripts were selected to perform qRT-PCR with three replicates. The specific primers were designed using Primer 5 (Table 1). A 20 μL qPCR reaction mixture contained 10 uL SsoFast EvaGreen supermix (Bio-Rad, Hercules, CA, USA), 2 uL diluted cDNA sample, 300 nM of primers. And then performed qRT-PCR with the cycling conditions by using Bio-Rad CFX96™ detection system: 95°C for 30 s, 40 cycles of 15 s at 95°C and 30 s at 60°C, in the end, the melting curve derived. Lastly, we used the 2<sup>-ΔΔCT</sup> method to analyze the data and chose the *UBC* gene (Forward primer: CATCTACTCGTCA ATCAGGGTT, Reverse primer: GTATGGGCTATCGGAAGGTC) as a reference [37].

**Table 1. Primers of qRT-PCR for validation of the selected transcripts.**

| Gene ID             | Description                                 | Primers (5'-3')                                      |
|---------------------|---------------------------------------------|------------------------------------------------------|
| comp94681_c0_seq1   | MYB protein                                 | F: GGTCATTGTCCAGATTCCACAR: CAGTGACCAGAAGCACCATAG     |
| comp109545_c0_seq1  | AP2 transcription factor                    | F: GAACCCATATACTAGACCCAAAGTGR: GCCAAAATCAGCTCCCAAATC |
| comp69475_c0_seq1   | transcription factor TGA                    | F: ATGGGTGAAGGTGGAAACTACR: CTTGTGCGATTGTCAAATCCTAG   |
| comp578479_c0_seq1  | MADS-box transcription factor               | F: AGAAAGGGTTTTGGGTGATACCR: CTCTTGAAAATGTCACTTGTCTAC |
| comp119263_c0_seq4  | WRKY transcription factor 33                | F: CTCAAACACATCCTACAAATTCCCR: AGAAATGGGAAGTGAAGGTGG  |
| comp114891_c0_seq1  | ABA responsive element binding factor       | F: ATTCTTGTCTGCCAGCTCAGR: TGAAGAGGGTGTATGTCTATTTTCG  |
| comp107847_c0_seq2  | ATP-binding cassette. subfamily F. member 2 | F: GATTTACCACAGCCATTCAACCR: CACTTACATTTACGGGCATG     |
| comp125136_c0_seq3  | delta-1-pyrroline-5-carboxylate synthetase  | F: CCCGTAGGAGTTGAAGGATTGR: CCCGAGAGCAGAGGATTTAAG     |
| comp126328_c0_seq23 | 6-phosphofructokinase 1                     | F: AAGTCTCAAGCACAGTACCACR: GAGCAGTATGGAGTTCGTGAG     |
| comp110755_c0_seq1  | unknown                                     | F: CTCAGAAATGGCATCACACGR: ATCGTGTCCGATGTCTTGTG       |

doi:10.1371/journal.pone.0159721.t001

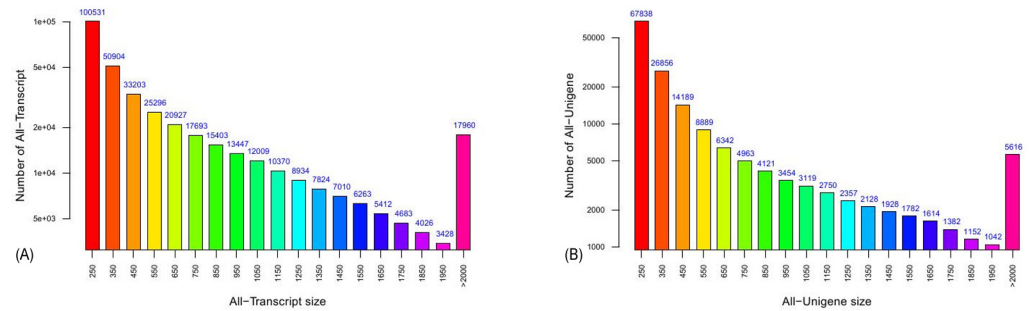

**Fig 1. Overview of the chrysanthemum transcriptome sequencing.** (A) Length distribution of chrysanthemum all-transcript. (B) Length distribution of chrysanthemum all-unigene.

doi:10.1371/journal.pone.0159721.g001

## Results and Discussion

### Sequencing and *de novo* assembly

NGS has been widely used for *de novo* transcriptome sequencing, especially in non-model organisms [38]. In this study, we established two cDNA libraries from chrysanthemum 'Jinba' under normal and salinity conditions, respectively. And a total of 10.0 Gb sequencing data were obtained by paired-end sequencing of Illumina Solexa RNA. Considering these reads have a substantially higher error rate, we filtered the raw data. The data retention rate was high and finally we got 94 million reads, the average length of which is 94.4 bp. After that, *de novo* assembly generated 365,323 unique transcripts ( $\geq 100$  bp) with an average length of 732.0 bp and 161,522 unigenes ( $\geq 100$  bp) with an average length of 575.7 bp from these reads. Length distribution of all-transcript and all-unigene are shown in Fig 1.

A total of 88,049 transcripts and 24,906 unigenes were greater than 1000 bp, and the N50 and N90 values were shown in Table 2. Among which, the longest transcript and unigene were all 12,403 bp. In addition, the GC content frequency distribution of unigenes is shown in Fig 2.

### Annotation of chrysanthemum transcript sequences

In contrast to different protein databases on the basis of amino acid sequence similarities, we had annotated the assembled transcripts of chrysanthemum. A total of 65,838 (40.8%), 40,075 (24.8%), 67,450 (41.8%), 34,614 (21.4%), 58,863 (36.4%) and 23,477 (14.5%) unigenes had significant hit in the NR, CDD, Swiss-Prot, Pfam, TrEMBL and KOG, respectively (Resemblance  $> 30\%$  and E-value  $\leq 1e-5$ ). The similarities of genes were mainly based on BLASTx.

To gain insight into the percentage of the chrysanthemum unigenes that showing similarity to genes in other plant species, we performed species distribution of chrysanthemum in NR database, in which 76.5% genes were annotated with the largest number of 10 species (Fig 3). Among the various plants, the chrysanthemum unigenes had the maximum number of homologous to *Vitis vinifera* (42.0%) while the *Populus trichocarpa* and *Ricinus communis* were 15.0% and 14.0%, respectively. Interestingly, these high similarities have also been described in the study of *chrysanthemum nankingense* (Asteraceae) [26]. And *Glycine max* (9.0%),

**Table 2. The statistics of *de novo* assembly.**

|                   | All ( $\geq 100$ bp) | $\geq 500$ bp | $\geq 1000$ bp | N50   | N90 | Total Length | Max Length | Min Length | Average Length |
|-------------------|----------------------|---------------|----------------|-------|-----|--------------|------------|------------|----------------|
| <b>Transcript</b> | 365,323              | 180,947       | 88,049         | 1,080 | 312 | 267,422,176  | 12,403     | 201        | 732.02         |
| <b>Unigene</b>    | 161,522              | 52,751        | 24,906         | 851   | 249 | 92,993,750   | 12,403     | 201        | 575.73         |

doi:10.1371/journal.pone.0159721.t002

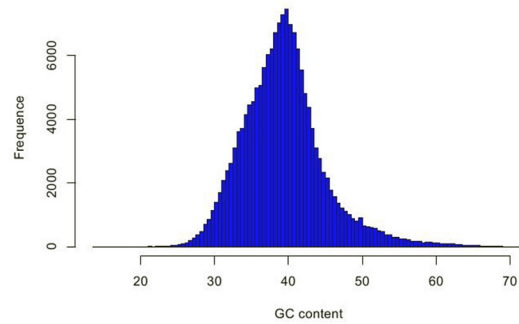

**Fig 2. The frequency distribution of unigene GC content in chrysanthemum.**

doi:10.1371/journal.pone.0159721.g002

*Botryotinia fuckeliana* (7.0%), others (13.0%) were in the following. These results may demonstrate that chrysanthemum has closer relationship with *Vitis vinifera* while *Arabidopsis lyrata* subsp. *lyrata* is further.

We further classified the functions by using the KOG database. 23,477 unigenes were assigned with 25 specific KOG categories, which were listed in Fig 4. The top three categories were "signal transduction mechanisms" with 5,061 unigenes (21.6%), "posttranslational modification, protein turnover, chaperones" with 4,938 unigenes (21.0%) and "general function prediction" only with 3,587 unigenes (15.3%). The KOG categories related to stress response are as follows: "defense mechanisms" (0.8%), "secondary metabolites biosynthesis, transport and catabolism" (7.8%), "inorganic ion transport and metabolism" (3.5%), and "lipid", "coenzyme", "carbohydrate", "nucleotide", "amino acid" transport and metabolism were 18.9% in total.

The GO analysis allowed the functional classification of 12,153 unigenes. As shown in Fig 5, among which 41.7% were assigned in the "biological process category", 31.3% in the "cellular component category", and 27.0% in the "molecular function category". The major classes of biological process among the comparison of GO classification were "metabolic process", "cellular process", "response to stimulus", "biological regulation" and "regulation of biological process". The predominant cellular components were "organelle", "cell", "cell part" and "membrane". And for molecular function were "binding", "catalytic activity", "electron carrier activity", "structural molecule activity" and "transporter activity".

Additionally, we predicted biochemical pathways from the KEGG database, in which, a total of 25,173 (15.6%) unigenes were grouped into 306 pathways. KEGG pathway analysis showed that the genes were mainly located in "ribosome" (ko03010, 2001 unigenes), "protein processing in endoplasmic reticulum" (ko04141, 727 unigenes), "RNA transport" (ko03013,

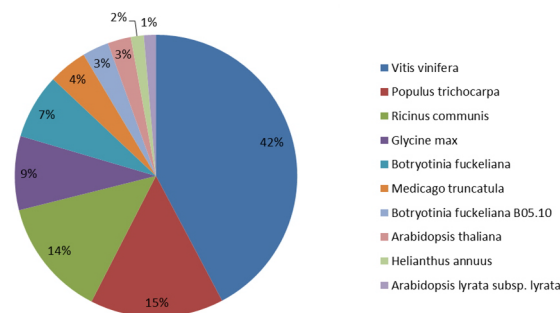

**Fig 3. The percentage of the chrysanthemum unigenes that showing similarity to genes in other plant species. The chrysanthemum unigenes aligned by BLASTx to the Nr database.**

doi:10.1371/journal.pone.0159721.g003

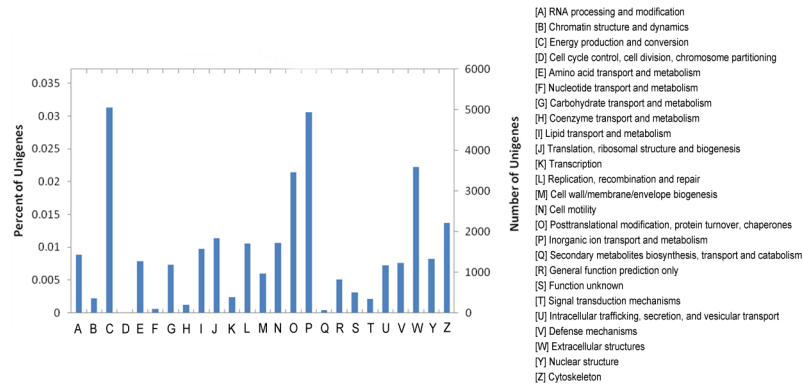

**Fig 4. Cluster of orthologous groups for eukaryotic complete genomes (KOG) classification.** A total of 23,477 sequences with KOG classifications within the 25 categories are shown.

doi:10.1371/journal.pone.0159721.g004

618 unigenes) and "spliceosome" (ko03040, 616 unigenes). Other important pathways related to abiotic stress include "arginine and proline metabolism" (ko00330), "plant hormone signal transduction" (ko04075), "glutathione metabolism" (ko00480), "flavonoid biosynthesis" (ko00941), "carotenoid biosynthesis" (ko00906) and so on.

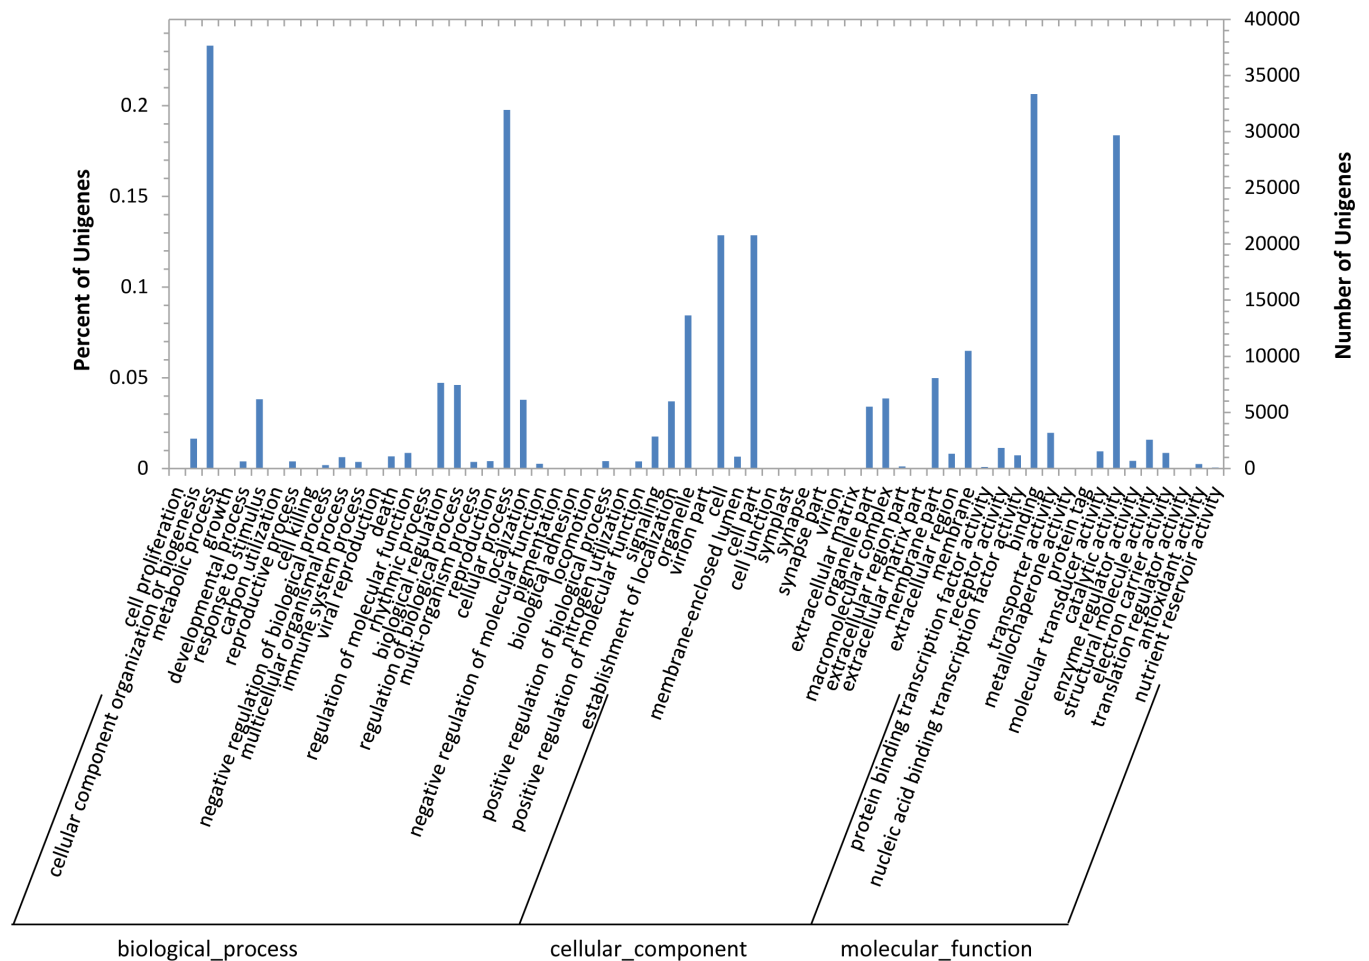

**Fig 5. Chrysanthemum functional classification by gene ontology (GO) analysis.** A total of 12,153 unigenes have been assigned GO terms and they are classified into three GO categories: biological process, cellular component, and molecular function.

doi:10.1371/journal.pone.0159721.g005

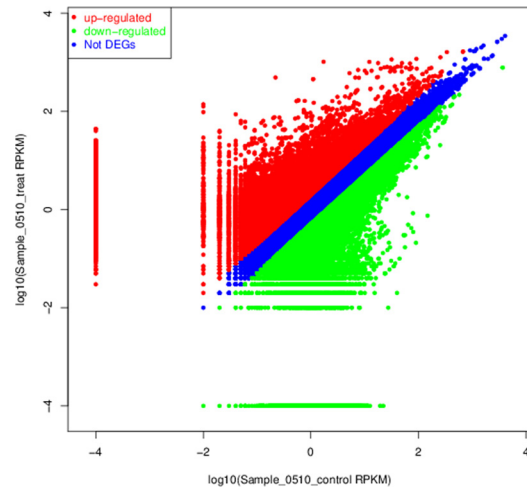

**Fig 6. The gene expression level of chrysanthemum between the two libraries (Sample\_0510\_control and Sample\_0510\_treat).** Red dots represent transcripts more prevalent in the library of salt-treated one, green dots show those present at a lower frequency in salt-treated chrysanthemum and blue dots indicate transcripts that did not change significantly.

doi:10.1371/journal.pone.0159721.g006

### Identification of DETs under salt stress in chrysanthemum

Here, we used the method of sequence similarity alignment to calculate the expression abundance of each transcript in two samples. Moreover, the differential expression analysis was made according to the expression abundance value. In total, we identified 126,646 DETs between salt-treated and control samples, and there were 60,685 DETs up-regulated and 65,961 down-regulated under salt stress. Based on the value of expression abundance (RPKM), the gene expression levels of two samples are shown in Fig 6.

To further evaluate the reliability of the Illumina sequencing results, ten differential expression transcripts were selected to perform qRT-PCR based on their predicted functions, such as transcription factors (MADS, MYB, WRKY, AP2, TAG), a salt transporter (ATP-binding cassette (ABC) transporters), a hormone responsive factor (ABA responsive element binding factor), a key regulatory enzyme involved in the biosynthesis of proline (*P5CS*, delta-1-pyrroline-5-carboxylate synthetase), a gene encoding *PFK1* (6-phosphofructokinase 1). As can be seen, there was one gene with unknown function. The result of qPCR experiment and RNA-seq were consistent (Fig 7).

### The enrichment analyses of DETs by GO and KEGG databases

The enrichment analysis of chrysanthemum transcripts by GO database help us to realize the function of these DETs and 638 GO terms were enriched ( $P$  value  $\leq 0.01$ ). "ATP binding" (9,005 DETs), followed by "membrane" (7,086 DETs), "integral to membrane" (6,113 DETs), "oxidation-reduction process" (5,244 DETs) and "metabolic process" (5,041 DETs). Other highly enriched GO terms related to stress were "oxidoreductase activity", "defense response", "protein kinase activity" and "protein serine/threonine kinase activity". This consequence indicated that the GO terms including DETs might occupy an important position in the molecular mechanism of salt resistance in chrysanthemum. Plant hormones have a functional role in plant response to biotic and abiotic stresses [39]. In our study, GO terms related to plant hormones including "abscisic acid biosynthetic process", "gibberellin 3-beta-dioxygenase activity", "jasmonate O-methyltransferase activity", "ethylene biosynthetic process", "cytokinin metabolic process" and "brassinosteroid biosynthetic process", all of which were enriched both in up-regulation and

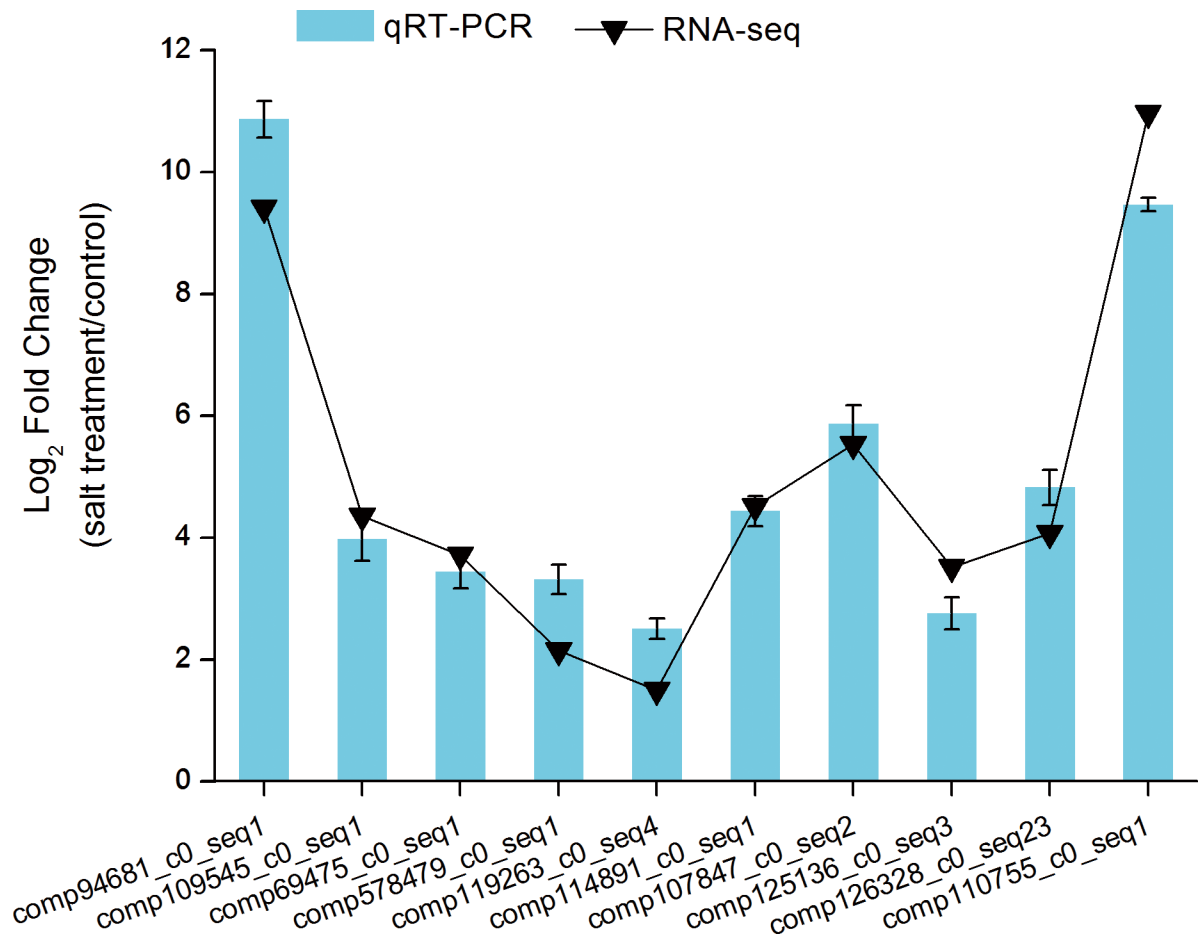

**Fig 7. The relative expression levels of ten DETs between RNA-seq and qRT-PCR in chrysanthemum.** The relative gene expression levels were determined by  $2^{-\Delta\Delta CT}$  as expressed. Transcript levels were normalized to the expression level of *UBC*. Error bars SE from three independent replicates.

doi:10.1371/journal.pone.0159721.g007

down-regulation. The former finding implied that plant secondary metabolites are widely involved in plant physiological processes, such as growth, development and defense [40, 41]. Nevertheless, GO terms related to plant secondary metabolites in this study including "terpenoid metabolic process", "flavonoid biosynthetic process", "lignin catabolic process", "organic acid metabolic process" and "alkaloid metabolic process" and so on. Furthermore, GO term "chlorophyll catabolic process" was up-regulated while "chlorophyll biosynthetic process" was down-regulated. This may be due to the damage of plant photosynthesis mechanism under salt stress.

In addition, we confirmed pathways by mapping DETs to terms in the KEGG database. 92 pathways were significantly enriched ( $P$  value  $\leq 0.01$ ) among the all 278 differentially expressed pathways. "Ribosome" was the most enriched pathway (1,821 DETs). Other crucial pathways related to abiotic stress including "plant hormone signal transduction", "sesquiterpenoid biosynthesis", "flavonoid biosynthesis", "alpha-Linolenic acid metabolism", "phenylpropanoid biosynthesis" and other pathways.

### Potential biological pathways influenced by salt stress

We analyzed biochemical pathways influenced by salt stress on the base of our expression profiling. The major identified pathways in chrysanthemum are shown in [S1 Table](#).



The accumulation of flavonoids is a hallmark of plant stress [42]. In this study, there were 133 DETs with KEGG annotation in flavonoid biosynthesis pathway. In addition, signal-transduction cascades mediate the sensing and processing of stimuli [43], and "MAPK signaling pathway", "Calcium signaling pathway", "PPAR signaling pathway" and "Plant hormone signal transduction" were all annotated DETs.

In plants, carotenoids are mainly found in the chloroplasts of plants and chromoplasts of the flowers and fruits, the two important functions in plant photosynthesis of which are participating in light absorption and preventing photooxidation in precursor cells [44, 45]. Meanwhile, carotenoids are also signaling molecule precursors of plants and can respond to outside stimulus [46]. Some reports showed that carotenoids not only can participate in the process of plant hormones biosynthesis, such as abscisic acid and strigolactone [47], but also the synthesis of defense chemicals [48]. Carotenoids can consider as a scavenger of free radicals and then reduce the hurt from stress [48]. In our study, the key enzyme "phytoene synthase" (crtB, EC:2.5.1.32), "beta-ring hydroxylase" (crtR-b, EC:1.14.-.-) and "beta-carotene 3-hydroxylase" (crtZ, EC:1.14.13.129) in the "carotenoid biosynthesis pathway" were found up-regulated. In rapeseed and tomato, phytoene synthase has been demonstrated to be the rate-limiting enzyme in carotenoid biosynthetic [49, 50]. The increasing of phytoene synthase content provided a sufficient amount of synthetic substrate, so that the  $\beta$ -carotene and zeaxanthin accumulated, and then presented up-regulated. In carotenoid biosynthesis pathway, 9-*cis*-epoxycarotenoid dioxygenase is the direct substrate for phytohormone abscisic acid (ABA) synthesis [51]. We found that "abscisic acid 8'-hydroxylase" (EC:1.14.13.93), "abscisic-aldehyde oxidase" (EC:1.2.3.14) and "9-*cis*-epoxycarotenoid dioxygenase" (EC:1.13.11.51) were all up-regulated. Thus, changes of carotenoid content and composition can lead to changes in plant physiology and biochemistry.

## Sensing and signaling genes involved in the response to salt stress

Ionic signaling pathway is an important component of salt stress signal transduction, and plant salt tolerance is related to the expression and activity changes of ion transporters to some extent, such as  $\text{Na}^+$ ,  $\text{K}^+$ ,  $\text{H}^+$  and  $\text{Ca}^{2+}$  [6]. Besides, the change of V-ATPase activity determines the survival of plant cells under stress [52]. Among the ion transport genes, 16  $\text{Ca}^{2+}/\text{H}^+$  antiporter (12 up-regulated and 4 down-regulated), 2  $\text{Na}^+$  symporter (all up-regulated) and 111 V-type  $\text{H}^+$ -ATPase (75 up-regulated and 36 down-regulated) were differentially expressed,

$\text{Ca}^{2+}$  is one of the very important ubiquitous second messengers in signal transduction pathways and usually its concentration increases in response to the stimuli including stress signals [53]. In previous studies, genes related to  $\text{Ca}^{2+}$  signaling pathway also maintain an important role in different environmental stresses response of rice [54], *Arabidopsis thaliana* [55], *Chrysanthemum nankingense* [36] and so on. In total, there were 51 genes found to be up-regulated while 100 found to be down-regulated in  $\text{Ca}^{2+}$  signaling pathway (S2 Table).  $\text{Ca}^{2+}$  signaling pathway include many members, such as calmodulin, calcium exchanger, calcium-binding protein, calcium dependent protein kinases (CDPKs) and CDPKs are unique  $\text{Ca}^{2+}$  sensors in higher plants [54]. What's more, *AtCPK4* and *AtCPK11* [56], *OsCDPK7* [57] were reported to confer stress tolerance. There were 28 CDPKs up-regulated and 18 down-regulated ( $\log_2$  fold change  $\geq 1$ ) in this study. Salt stress sensing and signaling genes also influenced by other protein kinases [58]. The major differentially expressed protein kinases are shown in S3 Table. The mitogen activated protein kinases (MAPKs) can be activated under abiotic stresses in plants [59]. The MAPK cascade itself is shaped by three major constituents, MAPK kinase kinase (MAP3K), MAPK kinase (MAP2K) and MAPK [60]. The MAPKs, such as *ZmSIMK1* [61], *OsMPK44* [62], *MKCK20* [63], are related to plant salt tolerance. There were 12 up-regulated

(log<sub>2</sub> fold change ≥ 1) and 34 down-regulated genes (log<sub>2</sub> fold change ≤ -1) involved in the MAPK cascade. Among which, only 6 *MAPKKK* and 3 *MAPKK* genes were up-regulated, and all three *MAPK* genes were up-regulated. Protein phosphatase 2C (PP2C) which is a Mn<sup>2+</sup>- or Mg<sup>2+</sup>- dependent protein serine/ threonine phosphatase act as a key player in plant ABA signal transduction processes [64, 65]. In this study, we identified 121 differentially expressed serine/ threonine-protein kinase genes. And there were 80 *PP2C* genes up-regulated (log<sub>2</sub> fold change ≥ 1) and only 7 down-regulated (log<sub>2</sub> fold change ≤ -1). Above all, there were 6 *PP2C* genes significantly differentially expressed (log<sub>2</sub> fold change ≥ 10). The differentially expressed *PP2Cs* are shown in [S4 Table](#).

**Salinity-responsive transcription factors.** Transcription factors act as upstream regulators to regulate gene expression in metabolic pathways [15]. In this study, we identified more than six major transcription factor (MYB, MYC, WRKY, AP2/ERF, HD-zip, E2F, zinc finger and so on) that were known to be stress-related genes. The major up or down regulated transcription factors are shown in [S5 Table](#). MYB proteins were the largest group in our study, which play regulatory roles in developmental processes and defense responses in plants [66] and have been found in *Arabidopsis* [66], wheat [67], rice [66] and other plants. In our DETs data, there were 126 up-regulated and 92 down-regulated MYB transcripts. And other researches have also reported that WRKY [68], AP2/ERF [69] and HD-zip [70] transcription factors together mediated salt response. *TOC1* is a member of pseudo response regulator (PRR) family and *TOC1* is a multi-domain signaling component of the plant circadian clock [71]. *TOC1* regulates the diurnal expression of the ABA-related gene *ABAR/CHLH/GUN5* by direct binding to its promoter [72]. 13 up-regulated PRR family genes were found including a *TOC1* homologue in our study. TGA proteins were found to be up (18) or down (16) regulated in this paper and that TGA protein is a member of bZIP transcription factor which regulates the expression of some stress- responsive genes [73]. These differentially expressed genes may provide help for the study of salt tolerance in chrysanthemum.

## Conclusions

The current study focuses on identifying the major differentially expressed genes in chrysanthemum during salt stress response using Illumina sequencing technology and validating them by qRT-PCR analysis. DEGs were identified in chrysanthemum under salt stress, including sensing and signaling genes, protein kinases and transcription factors. Functional annotation and classification, metabolic pathway analysis provided their function in possible regulation of salinity adaptation in chrysanthemum. These results provide valuable data for the molecular mechanisms to study the underlying salt tolerance and may be the basis of further research on gene regulatory networks of chrysanthemum.

## Supporting Information

**S1 Table. The major identified pathways in chrysanthemum.**  
(XLSX)

**S2 Table. The differentially expressed genes involved in Ca<sup>2+</sup> signaling pathway.**  
(XLSX)

**S3 Table. The major differentially expressed protein kinases in chrysanthemum.**  
(XLSX)

**S4 Table. The differentially expressed PP2Cs in chrysanthemum.**  
(XLSX)

**S5 Table. The major differentially expressed transcription factors in chrysanthemum.**  
(XLSX)

## Acknowledgments

We gratefully acknowledge Lin He for providing assistance in performing the experiments.

## Author Contributions

Conceived and designed the experiments: QLL. Performed the experiments: YHW TW KW QYL ZYB LZ. Analyzed the data: YHW QLL LZ. Contributed reagents/materials/analysis tools: YW YP BJ. Wrote the paper: YHW.

## References

1. Shrivastava P and Kumar R. Soil salinity: A serious environmental issue and plant growth promoting bacteria as one of the tools for its alleviation. *Saudi journal of biological sciences*. 2015; 22(2): 123–131. doi: [10.1016/j.sjbs.2014.12.001](https://doi.org/10.1016/j.sjbs.2014.12.001) PMID: [25737642](https://pubmed.ncbi.nlm.nih.gov/25737642/)
2. Gupta B and Huang B. Mechanism of salinity tolerance in plants: physiological, biochemical, and molecular characterization. *International journal of genomics*. 2014; 2014:1–18. doi: [10.1155/2014/701596](https://doi.org/10.1155/2014/701596)
3. Song AP, Li PL, Jiang JF, Chen SM, Li HY, Zeng J, et al. Phylogenetic and transcription analysis of chrysanthemum WRKY transcription factors. *International journal of molecular sciences*. 2014; 15(8): 14442–14455. doi: [10.3390/ijms150814442](https://doi.org/10.3390/ijms150814442) PMID: [25196345](https://pubmed.ncbi.nlm.nih.gov/25196345/)
4. Turan S, Cornish K, Kumar S. Salinity tolerance in plants: breeding and genetic engineering. *Aust J Crop Sci*. 2012; 6(9): 1337–1348B.
5. Hasegawa PM, Bressan RA, Zhu JK, Bohnert HJ. Plant cellular and molecular responses to high salinity. *Plant Mol Biol*. 2000; 51: 463–499. doi: [10.1146/annurev.arplant.51.1.463](https://doi.org/10.1146/annurev.arplant.51.1.463)
6. Zhu JK. Salt and drought stress signal transduction in plants. *Annu. Rev. Plant Biol*. 2002; 53: 247–73. doi: [10.1146/annurev.arplant.53.091401.143329](https://doi.org/10.1146/annurev.arplant.53.091401.143329) PMID: [12221975](https://pubmed.ncbi.nlm.nih.gov/12221975/)
7. Bartels D, Sunkar R. Drought and salt tolerance in plants. *Crit. Rev. Plant Sci*. 2005; 24: 23–58. doi: [10.1080/07352680590910410](https://doi.org/10.1080/07352680590910410).
8. Nakashima K, Tran L S P, Van Nguyen D, Fujita M, Maruyama K, Todaka D, et al. Functional analysis of a NAC-type transcription factor *OsNAC6* involved in abiotic and biotic stress-responsive gene expression in rice. *The Plant Journal*. 2007; 51(4): 617–630. doi: [10.1111/j.1365-3113X.2007.03168.x](https://doi.org/10.1111/j.1365-3113X.2007.03168.x) PMID: [17587305](https://pubmed.ncbi.nlm.nih.gov/17587305/)
9. Yang G, Zou H, Wu Y, Liu HK, Yuan YP. Identification and characterisation of candidate genes involved in chilling responses in maize (*Zea mays* L.). *Plant Cell, Tissue and Organ Culture (PCTOC)*. 2011; 106(1): 127–141. doi: [10.1007/s11240-010-9900-8](https://doi.org/10.1007/s11240-010-9900-8)
10. Tibbles LA and Woodgett JR. The stress-activated protein kinase pathways. *CMLS, Cell. Mol. Life Sci*. 1999; 55: 1230–1254. doi: [10.1007/s000180050369](https://doi.org/10.1007/s000180050369) PMID: [10487205](https://pubmed.ncbi.nlm.nih.gov/10487205/)
11. Kumar K and Sinha AK. Overexpression of constitutively active mitogen activated protein kinase kinase 6 enhances tolerance to salt stress in rice. *Rice*. 2013; 6(1): 25. doi: [10.1186/1939-8433-6-25](https://doi.org/10.1186/1939-8433-6-25) PMID: [24280045](https://pubmed.ncbi.nlm.nih.gov/24280045/)
12. Zhang K, Han YT, Zhao FL, Hu Y, Gao YR, Ma YF, et al. Genome-wide identification and expression analysis of the CDPK gene family in grape, *Vitis spp.* *BMC Plant Biology*. 2015; 15: 164. doi: [10.1186/s12870-015-0552-z](https://doi.org/10.1186/s12870-015-0552-z) PMID: [26122404](https://pubmed.ncbi.nlm.nih.gov/26122404/)
13. Pei LL, Guo YH, Xu ZS, Li LC, Chen M, Ma YZ. Research progress on stress-related protein kinases in plants. *Acta Bot. Boreal.–Occident. Sin*. 2012; 32(5): 1052–1061.
14. Liu Q, Zhang GY, Chen SY. Structure and regulatory function of plant transcription factors. *Chinese Science Bulletin*. 2001; 46(4): 271–278. doi: [10.1007/BF03187184](https://doi.org/10.1007/BF03187184)
15. Shan XH, Li YD, Jiang Y, Jiang ZL, Hao WY, Yuan YP. Transcriptome profile analysis of maize seedlings in response to high-salinity, drought and cold stresses by deep sequencing. *Plant Mol Biol Rep*. 2013; 31: 1485–1491. doi: [10.1007/s11105-013-0622-z](https://doi.org/10.1007/s11105-013-0622-z)
16. Ma H, Lu ZQ, Liu BB, Qiu Q, Liu JQ. Transcriptome analyses of a Chinese hazelnut species *Corylus mandshurica*. *BMC Plant Biol*. 2013; 13(1): 152. doi: [10.1186/1471-2229-13-152](https://doi.org/10.1186/1471-2229-13-152)

17. Hornett EA and Wheat CW. Quantitative RNA-Seq analysis in non-model species: assessing transcriptome assemblies as a scaffold and the utility of evolutionary divergent genomic reference species. *BMC Genomics*. 2012; 13(1): 361. doi: [10.1186/1471-2164-13-361](https://doi.org/10.1186/1471-2164-13-361)
18. Ekblom R and Galindo J. Applications of next generation sequencing in molecular ecology of non-model organisms. *Heredity*. 2011; 107(1): 1–15. doi: [10.1038/hdy.2010.152](https://doi.org/10.1038/hdy.2010.152) PMID: [21139633](https://pubmed.ncbi.nlm.nih.gov/21139633/)
19. Wang Z, Gerstein M, Snyder M. RNA-Seq: a revolutionary tool for transcriptomics. *Nat. Rev. Genetics*. 2009; 10: 57–63. doi: [10.1038/nrg2484](https://doi.org/10.1038/nrg2484) PMID: [19015660](https://pubmed.ncbi.nlm.nih.gov/19015660/)
20. Kreps JA, Wu YJ, Chang HS, Zhu T, Wang X, Harper JF. Transcriptome changes for *Arabidopsis* in response to salt, osmotic, and cold stress. *Plant Physiology*. 2002; 130(4): 2129–2141. doi: [10.1104/pp.008532](https://doi.org/10.1104/pp.008532) PMID: [12481097](https://pubmed.ncbi.nlm.nih.gov/12481097/)
21. Jiang YQ and Deyholos MK. Comprehensive transcriptional profiling of NaCl-stressed *Arabidopsis* roots reveals novel classes of responsive genes. *BMC Plant Biol*. 2006; 6: 25. doi: [10.1186/1471-2229-6-25](https://doi.org/10.1186/1471-2229-6-25) PMID: [17038189](https://pubmed.ncbi.nlm.nih.gov/17038189/)
22. Borsani O, Zhu J, Verslues PE, Sunkar R, Zhu JK. Endogenous siRNAs derived from a pair of natural cis-antisense transcripts regulate salt tolerance in *Arabidopsis*. *Cell*. 2005; 123(7): 1279–1291. doi: [10.1016/j.cell.2005.11.035](https://doi.org/10.1016/j.cell.2005.11.035) PMID: [16377568](https://pubmed.ncbi.nlm.nih.gov/16377568/)
23. Ueda A, Kathiresan A, Bennett J, Takabe T. Comparative transcriptome analyses of barley and rice under salt stress. *Theoretical and Applied Genetics*. 2006; 112(7): 1286–1294. doi: [10.1007/s00122-006-0231-4](https://doi.org/10.1007/s00122-006-0231-4) PMID: [16496119](https://pubmed.ncbi.nlm.nih.gov/16496119/)
24. Pandit A, Rai V, Bal S, Sinha S, Kumar V, Chauhan M, et al. Combining QTL mapping and transcriptome profiling of bulked RILs for identification of functional polymorphism for salt tolerance genes in rice (*Oryza sativa* L.). *Molecular Genetics and Genomics*. 2010; 284(2): 121–136. doi: [10.1007/s00438-010-0551-6](https://doi.org/10.1007/s00438-010-0551-6) PMID: [20602115](https://pubmed.ncbi.nlm.nih.gov/20602115/)
25. Rahman H, Jagadeeshselvam N, Valarmathi R, Sachin B, Sasikala R, Senthil N, et al. Transcriptome analysis of salinity responsiveness in contrasting genotypes of finger millet (*Eleusine coracana* L.) through RNA-sequencing. *Plant Mol Biol*. 2014; 85(4): 480–503. doi: [10.1007/s11103-014-0199-4](https://doi.org/10.1007/s11103-014-0199-4)
26. Wang HB, Jiang JF, Chen SM, Qi XY, Peng H, Li PR, et al. Next-generation sequencing of the *Chrysanthemum Nankingense* (Asteraceae) transcriptome permits large-scale unigene assembly and SSR marker discovery. *PLoS One*. 2013; 8(4): e62293. doi: [10.1371/journal.pone.0062293](https://doi.org/10.1371/journal.pone.0062293) PMID: [23626799](https://pubmed.ncbi.nlm.nih.gov/23626799/)
27. Janz D, Behnke K, Schnitzler JP, Kanawati B, Schmitt-Kopplin P, Polle A. Pathway analysis of the transcriptome and metabolome of salt sensitive and tolerant poplar species reveals evolutionary adaption of stress tolerance mechanisms. *BMC Plant Biology*. 2010; 10(1): 1. doi: [10.1186/1471-2229-10-150](https://doi.org/10.1186/1471-2229-10-150)
28. Liu QL, Xu KD, Pan YZ, Jiang BB, Liu GL, Jia Y, et al. Functional analysis of a novel chrysanthemum WRKY transcription factor gene involved in salt tolerance. *Plant molecular biology reporter*. 2014; 32(1): 282–289. doi: [10.1007/s11105-013-0639-3](https://doi.org/10.1007/s11105-013-0639-3)
29. Zhong SL, Joung JG, Zheng Y, Chen YR, Liu B, Shao Y, et al. High-throughput illumina strand-specific RNA sequencing library preparation. *Cold Spring Harb Protoc*. 2011; 2011(8): 940–949. doi: [10.1101/pdb.prot5652](https://doi.org/10.1101/pdb.prot5652) PMID: [21807852](https://pubmed.ncbi.nlm.nih.gov/21807852/)
30. Grabherr MG, Haas BJ, Yassour M, Levin JZ, Thompson DA, Amit I, et al. Full-length transcriptome assembly from RNA-Seq data without a reference genome. *Nature Biotechnology*. 2011; 29: 644–652. doi: [10.1038/nbt.1883](https://doi.org/10.1038/nbt.1883) PMID: [21572440](https://pubmed.ncbi.nlm.nih.gov/21572440/)
31. Liu MY, Qiao GR, Jiang J, Yang HQ, Xie LH, Xie JZ, et al. Transcriptome sequencing and *de novo* analysis for ma bamboo (*Dendrocalamus latiflorus* Munro) using the illumina platform. *PLoS One*. 2012; 7(10): e46766. doi: [10.1371/journal.pone.0046766](https://doi.org/10.1371/journal.pone.0046766) PMID: [23056442](https://pubmed.ncbi.nlm.nih.gov/23056442/)
32. Conesa A, Götz S, García-Gómez JM, Terol J, Talón M, Robles M. Blast2GO: a universal tool for annotation, visualization and analysis in functional genomics research. *Bioinformatics*. 2005; 21(18): 3674–3676. doi: [10.1093/bioinformatics/bti610](https://doi.org/10.1093/bioinformatics/bti610) PMID: [16081474](https://pubmed.ncbi.nlm.nih.gov/16081474/)
33. Mortazavi A, Williams BA, McCue K, Schaeffer L, Wold B. Mapping and quantifying mammalian transcriptomes by RNA-Seq. *Nat Methods*. 2008; 5(7): 621–628. doi: [10.1038/nmeth.1226](https://doi.org/10.1038/nmeth.1226) PMID: [18516045](https://pubmed.ncbi.nlm.nih.gov/18516045/)
34. Xu YJ, Gao S, Yang YJ, Huang MY, Cheng LN, Wei Q, et al. Transcriptome sequencing and whole genome expression profiling of chrysanthemum under dehydration stress. *BMC Genomics*. 2013; 14(1): 662. doi: [10.1186/1471-2164-14-662](https://doi.org/10.1186/1471-2164-14-662)
35. Audic S and Claverie JM. The significance of digital gene expression profiles. *Genome Res*. 1997; 7(10): 986–995. doi: [10.1101/gr.7.10.986](https://doi.org/10.1101/gr.7.10.986) PMID: [9331369](https://pubmed.ncbi.nlm.nih.gov/9331369/)
36. Ren LP, Sun J, Chen SM, Gao JJ, Dong B, Liu YN, et al. A transcriptomic analysis of *Chrysanthemum nankingense* provides insights into the basis of low temperature tolerance. *BMC Genomics*. 2014; 15(1): 844. doi: [10.1186/1471-2164-15-844](https://doi.org/10.1186/1471-2164-15-844)

37. Gu CS, Chen SM, Liu ZL, Shan H, Luo HL, Guan ZY, et al. Reference gene selection for quantitative real-time PCR in chrysanthemum subjected to biotic and abiotic stress. *Mol Biotechnol*. 2011; 49(2): 192–197. doi: [10.1007/s12033-011-9394-6](https://doi.org/10.1007/s12033-011-9394-6) PMID: [21416201](https://pubmed.ncbi.nlm.nih.gov/21416201/)
38. Metzker ML. Sequencing technologies—the next generation. *Nat Rev Genet*. 2010; 11: 31–46. doi: [10.1038/nrg2626](https://doi.org/10.1038/nrg2626)
39. Bari R and Jones JD. Role of plant hormones in plant defence responses. *Plant Molecular Biology*. 2009; 69(4): 473–488. doi: [10.1007/s11103-008-9435-0](https://doi.org/10.1007/s11103-008-9435-0) PMID: [19083153](https://pubmed.ncbi.nlm.nih.gov/19083153/)
40. Arti B, Rakesh M, Pushpa L, Guru S. K., Sandeep A. Role of secondary Metabolites and brassinosteroids in plant defense against environmental stresses. *Journal of Plant Growth Regulation*. 2013; 32(1): 216–232. doi: [10.1007/s00344-012-9272-x](https://doi.org/10.1007/s00344-012-9272-x)
41. Zhuang Y, Zhou XH, Liu J. Conserved miRNAs and their response to salt stress in wild eggplant *Solanum linnaeanum* roots. *Int. J. Mol. Sci*. 2014; 15(1): 839–849. doi: [10.3390/ijms15010839](https://doi.org/10.3390/ijms15010839) PMID: [24413753](https://pubmed.ncbi.nlm.nih.gov/24413753/)
42. Winkel-Shirley B. Biosynthesis of flavonoids and effects of stress. *Current opinion in plant biology*. 2002; 5(3): 218–223. doi: [10.1016/S1369-5266\(02\)00256-X](https://doi.org/10.1016/S1369-5266(02)00256-X) PMID: [11960739](https://pubmed.ncbi.nlm.nih.gov/11960739/)
43. Berg JM, Tymoczko JL, Stryer L. *Biochemistry*. 5th ed. New York: W H Freeman; 2002.
44. Demmig-Adams B and Adams WW. The role of xanthophyll cycle carotenoids in the protection of photosynthesis. *Trends Plant Sci*. 1996; 1(1): 21–26. doi: [10.1016/S1360-1385\(96\)80019-7](https://doi.org/10.1016/S1360-1385(96)80019-7)
45. Muller P, Li XR, Niyogi KK. Non-photochemical quenching. A response to excess light energy. *Plant Physiol*. 2001; 125(4): 1558–1566. doi: [10.1104/pp.125.4.1558](https://doi.org/10.1104/pp.125.4.1558) PMID: [11299337](https://pubmed.ncbi.nlm.nih.gov/11299337/)
46. McNulty HP, Byun J, Lockwood SF, Jacob RF, Mason RP. Differential effects of carotenoids on lipid peroxidation due to membrane interactions: X-ray diffraction analysis. *Biochim Biophys Acta*. 2007; 1768(1): 167–174. doi: [10.1016/j.bbame.2006.09.010](https://doi.org/10.1016/j.bbame.2006.09.010) PMID: [17070769](https://pubmed.ncbi.nlm.nih.gov/17070769/)
47. Gomez-Roldan V, Fernas S, Brewer PB, Puech-Pagès V, Dun EA, Pillot JP, et al. Strigolactone inhibition of shoot branching. *Nature*. 2008; 455(7210): 189–194. doi: [10.1038/nature07271](https://doi.org/10.1038/nature07271) PMID: [18690209](https://pubmed.ncbi.nlm.nih.gov/18690209/)
48. Rolland N, Curien G, Finazzi G, Kuntz M, Marechal E, Matringe M, et al. The biosynthetic capacities of the plastids and integration between cytoplasmic and chloroplast processes. *Annu.Rev Genet*. 2012; 46: 233–264. doi: [10.1146/annurev-genet-110410-132544](https://doi.org/10.1146/annurev-genet-110410-132544) PMID: [22934643](https://pubmed.ncbi.nlm.nih.gov/22934643/)
49. Wang YP, Liu QC, Zhai H. Expression and regulation of genes related to plant carotenoid biosynthesis and their application in plant gene engineering. *Molecular Plant Breeding*. 2006; 4: 103–110.
50. Paull RE, Irikura B, Wu P, Turano H, Chen NJ, Blas A, et al. Fruit development, ripening and quality related genes in the papaya genome. *Tropical Plant Biology*. 2008; 1(3): 246–277. doi: [10.1007/s12042-008-9021-2](https://doi.org/10.1007/s12042-008-9021-2)
51. Lu S and Li L. Carotenoid metabolism: biosynthesis, regulation, and beyond. *Journal of Integrative Plant Biology*. 2008; 50(7): 778–785. doi: [10.1111/j.1744-7909.2008.00708.x](https://doi.org/10.1111/j.1744-7909.2008.00708.x) PMID: [18713388](https://pubmed.ncbi.nlm.nih.gov/18713388/)
52. Dietz KJ, Tavakoli N, Kluge C. Significance of the V-type ATPase for the adaptation to stressful growth conditions and its regulation on the molecular and biochemical level. *J Exp Bot*. 2001; 52:1969–1980. doi: [10.1093/jexbot/52.363.1969](https://doi.org/10.1093/jexbot/52.363.1969) PMID: [11559732](https://pubmed.ncbi.nlm.nih.gov/11559732/)
53. Tuteja N, Sopory SK. Chemical signaling under abiotic stress environment in plants. *Plant signaling & behavior*. 2008; 3(8): 525–536. doi: [10.4161/psb.3.8.6186](https://doi.org/10.4161/psb.3.8.6186)
54. Wan BL, Lin YJ, Mou TM. Expression of rice Ca<sup>2+</sup>-dependent protein kinases (CDPKs) genes under different environmental stresses. *FEBS Lett*. 2007; 581: 1179–1189. doi: [10.1016/j.febslet.2007.02.030](https://doi.org/10.1016/j.febslet.2007.02.030) PMID: [17336300](https://pubmed.ncbi.nlm.nih.gov/17336300/)
55. Knight H, Trewavas AJ, Knight MR. Calcium signaling in *Arabidopsis thaliana* responding to drought and salinity. *Plant J*. 1997; 12: 1067–1078. doi: [10.1046/j.1365-313X.1997.12051067.x](https://doi.org/10.1046/j.1365-313X.1997.12051067.x) PMID: [9418048](https://pubmed.ncbi.nlm.nih.gov/9418048/)
56. Zhu SY, Yu XC, Wang XJ, Zhao R, Li Y, Fan RC, et al. Two calcium-dependent protein kinases, *CPK4* and *CPK11*, regulate abscisic acid signal transduction in *Arabidopsis*. *Plant Cell*. 2007; 19(10): 3019–3036. doi: [10.1105/tpc.107.050666](https://doi.org/10.1105/tpc.107.050666) PMID: [17921317](https://pubmed.ncbi.nlm.nih.gov/17921317/)
57. Saijo Y, Hata S, Kyozuka J, Shimamoto K, Izui K. Over-expression of a single Ca<sup>2+</sup>-dependent protein kinase confers both cold and salt/drought tolerance on rice plants. *Plant J*. 2000; 23(3): 319–327. doi: [10.1046/j.1365-313x.2000.00787.x/full](https://doi.org/10.1046/j.1365-313x.2000.00787.x/full) PMID: [10929125](https://pubmed.ncbi.nlm.nih.gov/10929125/)
58. Pérez-Salamó I, Papdi C, Rigó G, Zsigmond L, Vilela B, Lumbreras V, et al. The heat shock factor A4A confers salt tolerance and is regulated by oxidative stress and the mitogen- activated protein kinases MPK3 and MPK6. *Plant Physiol* 2014; 165(1): 319–334. doi: [10.1104/pp.114.237891](https://doi.org/10.1104/pp.114.237891) PMID: [24676858](https://pubmed.ncbi.nlm.nih.gov/24676858/)

59. Boudsocq M and Lauriere C. Osmotic signaling in plants. Multiple pathways mediated by emerging kinase families. *Plant Physiol.* 2005; 138(3): 1185–1194. doi: [10.1104/pp.105.061275](https://doi.org/10.1104/pp.105.061275) PMID: [16009994](https://pubmed.ncbi.nlm.nih.gov/16009994/)
60. Meister M, Tomasovic A, Banning A, Tikkanen R. Mitogen-activated protein (MAP) kinase scaffolding proteins: a recount. *International journal of molecular sciences.* 2013; 14(3): 4854–4884. doi: [10.3390/ijms14034854](https://doi.org/10.3390/ijms14034854) PMID: [23455463](https://pubmed.ncbi.nlm.nih.gov/23455463/)
61. Gu L, Liu Y, Zong X, Liu L, Li DP, Li DQ. Overexpression of maize mitogen-activated protein kinase gene, *ZmSIMK1* in *Arabidopsis* increases tolerance to salt stress. *Mol Biol Rep.* 2010; 37: 4067–4073. doi: [10.1007/s11033-010-0066-6](https://doi.org/10.1007/s11033-010-0066-6) PMID: [20339925](https://pubmed.ncbi.nlm.nih.gov/20339925/)
62. Jeong MJ, Lee SK, Kim BG, Kwon TR, Cho WS, Park YT, et al. A rice (*Oryza sativa* L.) MAP kinase gene, *OsMAPK44*, is involved in response to abiotic stresses. *Plant Cell Tissue Organ Cult.* 2006; 85: 151–160. doi: [10.1007/s11240-005-9064-0](https://doi.org/10.1007/s11240-005-9064-0)
63. Kim JM, Woo DH, Kim SH, Lee SY, Park HY, Seok HY, et al. *Arabidopsis* MKKK20 is involved in osmotic stress response via regulation of MPK6 activity. *Plant Cell Rep.* 2012; 31: 217–224. doi: [10.1007/S00299-011-1157-0](https://doi.org/10.1007/S00299-011-1157-0) PMID: [21969089](https://pubmed.ncbi.nlm.nih.gov/21969089/)
64. Das AK, Helps NR, Cohen PT, Barford D. Crystal structure of the protein serine/ threonine phosphatase 2C at 2.0 Å resolution. *The EMBO journal.* 1996; 15(24): 6798. PMID: [9003755](https://pubmed.ncbi.nlm.nih.gov/9003755/)
65. Rodriguez PL. Protein phosphatase 2C (PP2C) function in higher plants. *Plant molecular biology.* 1998; 38(6): 919–927. doi: [10.1023/A:1006054607850](https://doi.org/10.1023/A:1006054607850) PMID: [9869399](https://pubmed.ncbi.nlm.nih.gov/9869399/)
66. Chen YH, Yang XY, He K, Liu MH, Li JG, Gao ZF, et al. The MYB transcription factor superfamily of *Arabidopsis*: expression analysis and phylogenetic comparison with the rice MYB family. *Plant Molecular Biology.* 2006; 60:107–124. doi: [10.1007/s11103-005-2910-y](https://doi.org/10.1007/s11103-005-2910-y) PMID: [16463103](https://pubmed.ncbi.nlm.nih.gov/16463103/)
67. Cai HS, Tian S, Liu CL, Dong HS. Identification of a *MYB3R* gene involved in drought, salt and cold stress in wheat (*Triticum aestivum* L.). *Gene.* 2011; 485(2): 146–152. doi: [10.1016/j.gene.2011.06.026](https://doi.org/10.1016/j.gene.2011.06.026) PMID: [21763408](https://pubmed.ncbi.nlm.nih.gov/21763408/)
68. Zhou L, Wang NN, Gong SY, Lu R, Li Y, Li XB. Overexpression of a cotton (*Gossypium hirsutum*) WRKY gene, *GhWRKY34*, in *Arabidopsis* enhances salt-tolerance of the transgenic plants. 2015; 96: 311–320. doi: [10.1016/j.plaphy.2015.08.016](https://doi.org/10.1016/j.plaphy.2015.08.016) PMID: [26332661](https://pubmed.ncbi.nlm.nih.gov/26332661/)
69. Zhu Q, Zhang JT, Gao XS, Tong JH, Xiao LT, Li WB, et al. The *Arabidopsis* AP2/ERF transcription factor *RAP2.6* participates in ABA, salt and osmotic stress responses. 2010; 457(1–2): 1–12. doi: [10.1016/j.gene.2010.02.011](https://doi.org/10.1016/j.gene.2010.02.011) PMID: [20193749](https://pubmed.ncbi.nlm.nih.gov/20193749/)
70. Dezar CA, Fedrigo GV, Chan RL. The promoter of the sunflower HD-Zip protein gene *Hahb4* directs tissue-specific expression and is inducible by water stress, high salt concentrations and ABA. *Plant Science.* 2005; 169(2): 447–456. doi: [10.1016/j.plantsci.2005.04.008](https://doi.org/10.1016/j.plantsci.2005.04.008)
71. Kolmos E, Schoof H, Plümer M, Davis SJ. Structural insights into the function of the core-circadian factor TIMING OF CAB2 EXPRESSION 1 (*TOC1*). *Journal of Circadian Rhythms.* 2008; 6(1): 3. doi: [10.1186/1740-3391-6-3](https://doi.org/10.1186/1740-3391-6-3)
72. Castells E, Portolés S, Huang W, Mas P. A functional connection between the clock component *TOC1* and abscisic acid signaling pathways. *Plant signaling & behavior.* 2010; 5(4): 409–411. doi: [10.4161/psb.5.4.11213](https://doi.org/10.4161/psb.5.4.11213)
73. Seong ES, Kwon S, Ghimire BK, Yu CY, Cho DH, Lim JD, et al. *LebZIP2* induced by salt and drought stress and transient overexpression by *Agrobacterium*. *BMB reports.* 2008; 41(10): 693–698. doi: [10.5483/BMBRep.2008.41.10.693](https://doi.org/10.5483/BMBRep.2008.41.10.693) PMID: [18959814](https://pubmed.ncbi.nlm.nih.gov/18959814/)
